# Supplementary material for: Efficient Propylene/Ethylene Separation in Highly Porous Metal–Organic Frameworks
Source: MDPI journal article supplement (doi:10.3390/ma16010154), 2022-12-23
Supplement: s1 [file s1]

# Efficient propylene/ethylene separation in highly porous metal-organic frameworks

Xiao-Min Liu 1, Lin-Hua Xie 2,\* and Yufeng Wu 1,\*

1 Institute of Circular Economy, Beijing University of Technology, Beijing 100124, P. R. China

2 Beijing Key Laboratory for Green Catalysis and Separation and Department of Environmental Chemical Engineering, Faculty of Environment and Life, Beijing University of Technology, Beijing 100124, China

**Table S1.** Crystal data and structure refinements for Fe2M-L.

|                                                                 | <b>Fe<sub>2</sub>Mn-L</b>                                          | <b>Fe<sub>2</sub>Co-L</b>                                          | <b>Fe<sub>2</sub>Ni-L</b>                                          |
|-----------------------------------------------------------------|--------------------------------------------------------------------|--------------------------------------------------------------------|--------------------------------------------------------------------|
| empirical formula                                               | Fe <sub>2</sub> MnC <sub>78</sub> H <sub>112</sub> O <sub>28</sub> | Fe <sub>2</sub> CoC <sub>78</sub> H <sub>112</sub> O <sub>28</sub> | Fe <sub>2</sub> NiC <sub>78</sub> H <sub>112</sub> O <sub>28</sub> |
| <i>M</i>                                                        | 1832.43                                                            | 1836.42                                                            | 1836.20                                                            |
| Temperature/K                                                   | 100(2)                                                             | 100(2)                                                             | 100(2)                                                             |
| crystal system                                                  | Trigonal                                                           | Trigonal                                                           | Trigonal                                                           |
| space group                                                     | <i>R</i> -3c                                                       | <i>R</i> -3c                                                       | <i>R</i> -3c                                                       |
| <i>a</i> /Å                                                     | 27.4975(2)                                                         | 27.6077(3)                                                         | 27.5618(2)                                                         |
| <i>c</i> /Å                                                     | 73.1343(7)                                                         | 72.6748(11)                                                        | 72.9933(6)                                                         |
| <i>V</i> /Å <sup>3</sup>                                        | 47889.2(8)                                                         | 47970.6(13)                                                        | 48020.7(8)                                                         |
| <i>Z</i>                                                        | 18                                                                 | 18                                                                 | 18                                                                 |
| <i>D</i> <sub>calc</sub> /g cm <sup>-3</sup>                    | 1.144                                                              | 1.144                                                              | 1.143                                                              |
| <i>μ</i> /mm <sup>-1</sup>                                      | 3.694                                                              | 3.943                                                              | 2.940                                                              |
| reflns collected                                                | 54790                                                              | 55582                                                              | 58594                                                              |
| Independent reflns                                              | 9061                                                               | 9081                                                               | 10223                                                              |
| <i>R</i> <sub>int</sub>                                         | 0.0620                                                             | 0.0686                                                             | 0.0349                                                             |
| <i>θ</i> range (°)                                              | 3.546 to 65.080                                                    | 3.559 to 65.082                                                    | 3.549 to 71.075                                                    |
| Completeness                                                    | 99.7 %                                                             | 99.8 %                                                             | 99.8 %                                                             |
| GOF                                                             | 1.025                                                              | 1.017                                                              | 1.019                                                              |
| <i>R</i> <sub>1</sub> [ <i>I</i> > 2σ( <i>I</i> )] <sup>a</sup> | 0.0639                                                             | 0.0675                                                             | 0.0592                                                             |
| <i>wR</i> <sub>2</sub> (all data) <sup>b</sup>                  | 0.1569                                                             | 0.1615                                                             | 0.1497                                                             |
| <i>Δρ</i> <sub>max/min</sub> (e/Å <sup>3</sup> )                | 0.685/-0.651                                                       | 0.999/-0.701                                                       | 0.903/-0.445                                                       |

<sup>a</sup> *R*<sub>1</sub> =  $\sum ||F_o| - |F_c|| / \sum |F_o|$ , <sup>b</sup> *wR*<sub>2</sub> =  $[\sum w(F_o^2 - F_c^2)^2 / \sum w(F_o^2)^2]^{1/2}$ .

**Table S2.** ICP-AES analysis results for the bulk samples of Fe2M-L.

| <b>Sample</b>             | <b>Percentage of Fe ion</b> | <b>Percentage of M ion</b> | <b>Molar ratio of Fe to M</b> |
|---------------------------|-----------------------------|----------------------------|-------------------------------|
| <b>Fe<sub>2</sub>Mn-L</b> | 66.5                        | 33.5                       | 1.99                          |
| <b>Fe<sub>2</sub>Co-L</b> | 66.8                        | 33.2                       | 2.01                          |
| <b>Fe<sub>2</sub>Ni-L</b> | 66.2                        | 33.8                       | 1.96                          |

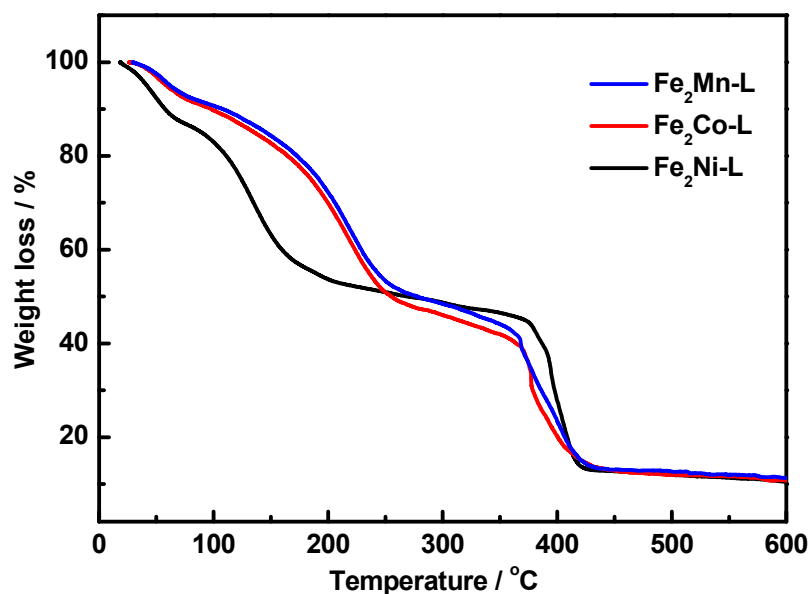

**Figure S1.** TGA curves of the as-synthesized Fe<sub>2</sub>M-L samples, indicating the presence of about 12 DMF molecules per formula inside their pores.

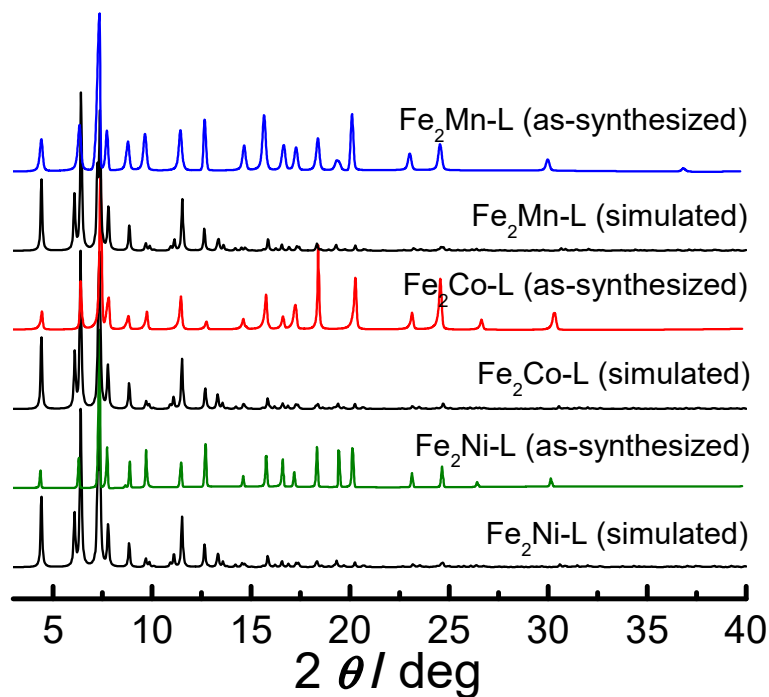

**Figure S2.** PXRD patterns of the as-synthesized Fe<sub>2</sub>M-L samples in comparison with their simulated PXRD patterns.

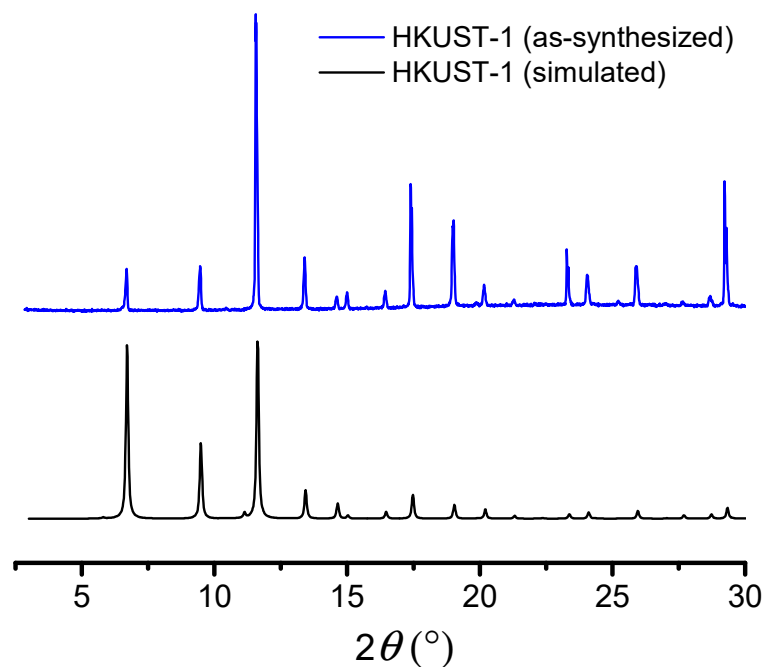

**Figure S3.** PXRD pattern of the as-synthesized HKUST-1 sample in comparison with its simulated PXRD pattern.

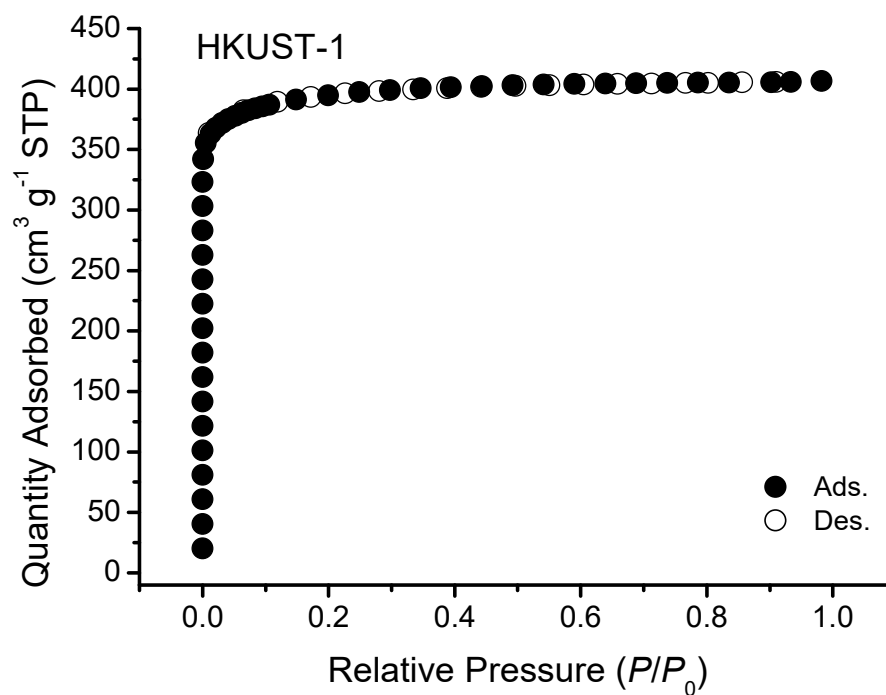

**Figure S4.** N<sub>2</sub> adsorption isotherm of the prepared HKUST-1 sample recorded at 77 K.

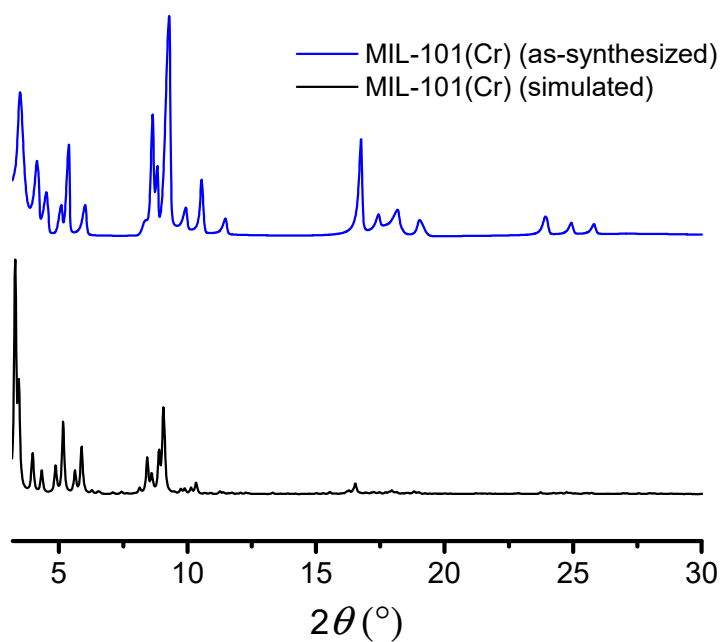

**Figure S5.** PXRD pattern of the as-synthesized MIL-101(Cr) sample in comparison with its simulated PXRD pattern.

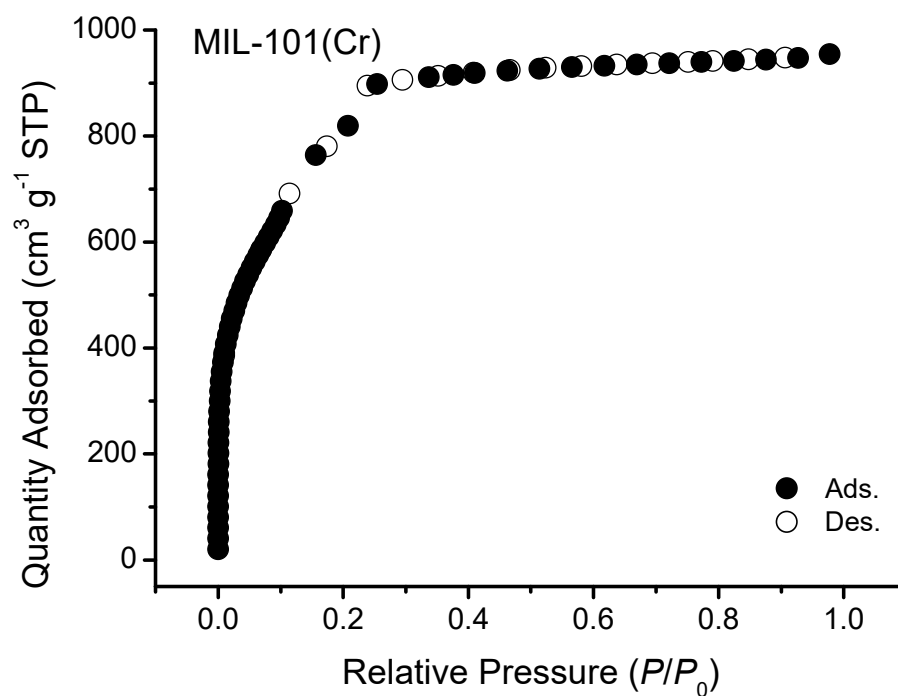

**Figure S6.** N<sub>2</sub> adsorption isotherm of the prepared MIL-101(Cr) sample recorded at 77 K.

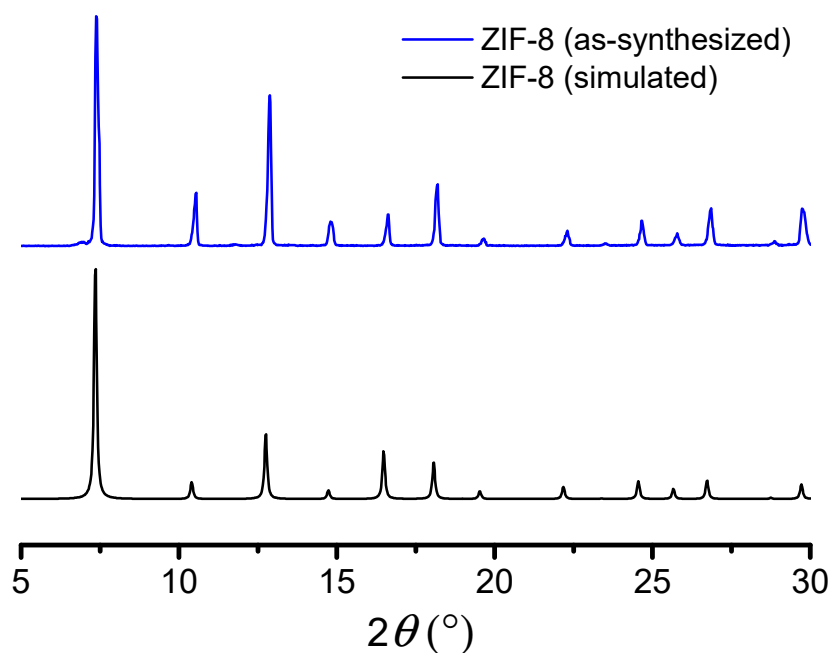

**Figure S7.** PXRD pattern of the as-synthesized ZIF-8 sample in comparison with its simulated PXRD pattern.

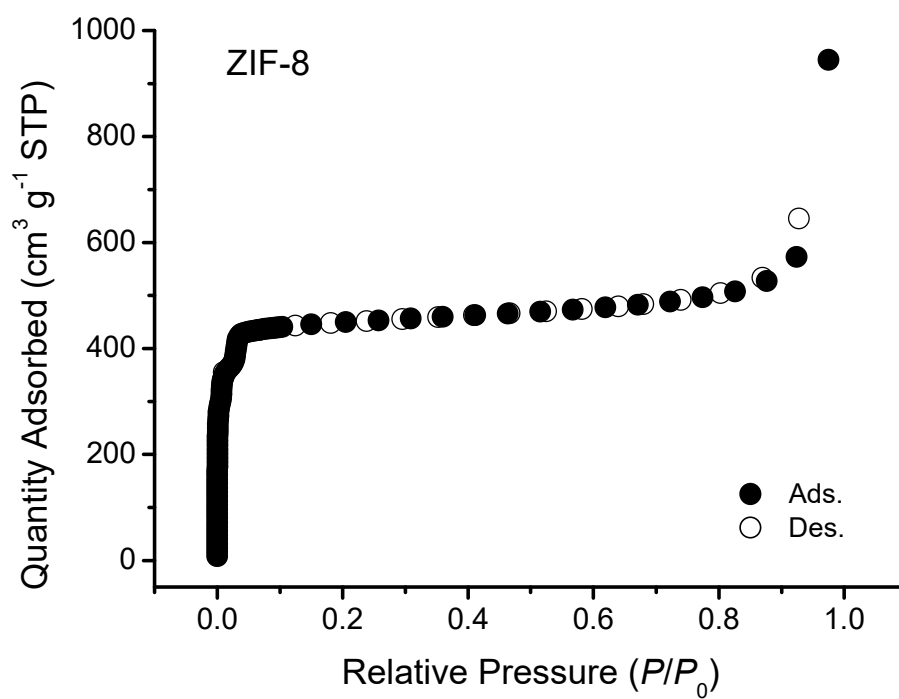

**Figure S8.** N<sub>2</sub> adsorption isotherm of the prepared ZIF-8 sample recorded at 77 K.

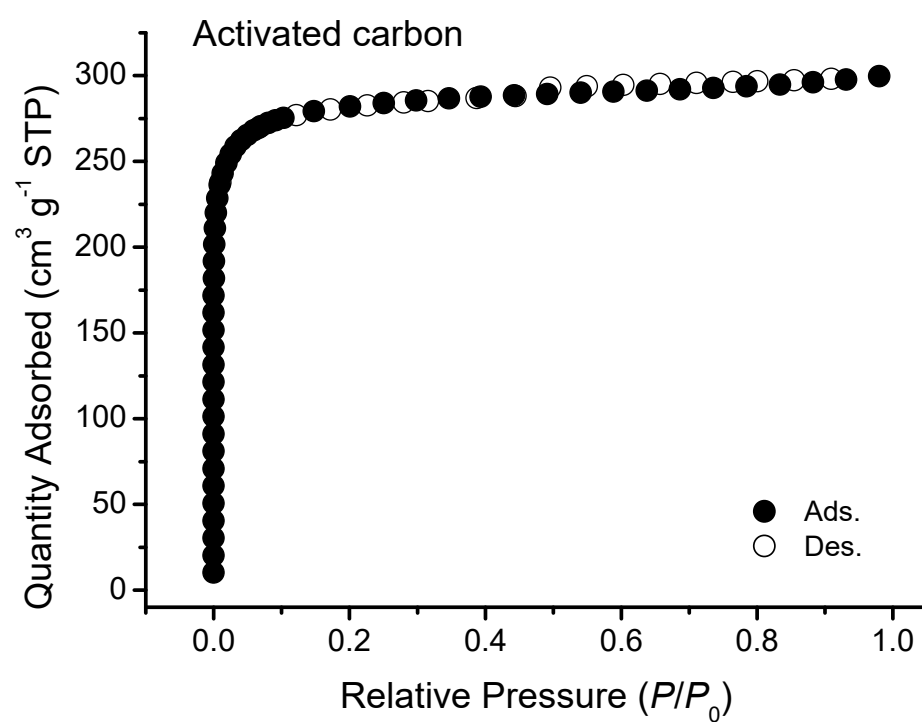

Figure S9. N<sub>2</sub> adsorption isotherm of the activated carbon sample recorded at 77 K.

32

33

34

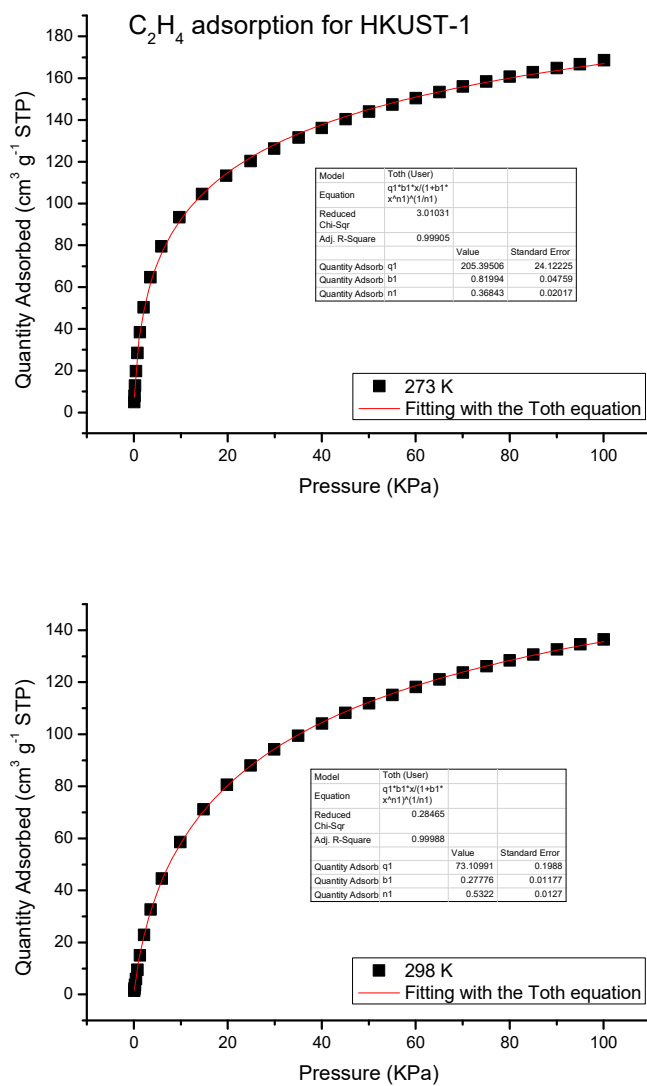

**Figure S10.**  $C_2H_4$  adsorption isotherms of the prepared HKUST-1 sample recorded at 273 and 298 K, and fitting results of the isotherms by the Toth equation.

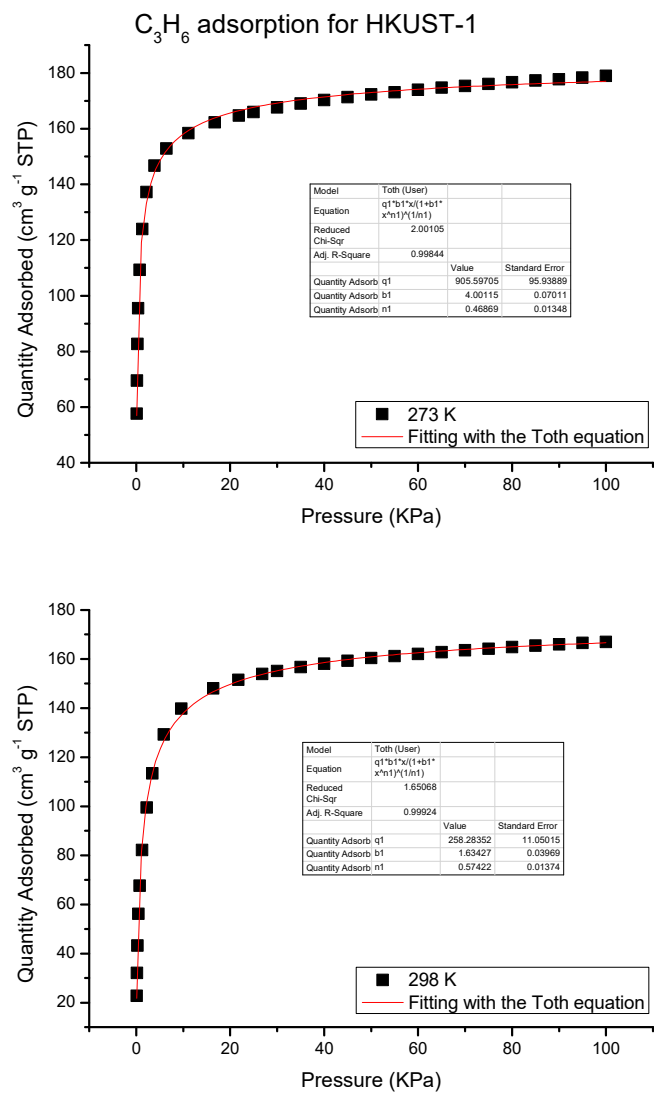

**Figure S11.** C<sub>3</sub>H<sub>6</sub> adsorption isotherms of the prepared HKUST-1 sample recorded at 273 and 298 K, and fitting results of the isotherms by the Toth equation.



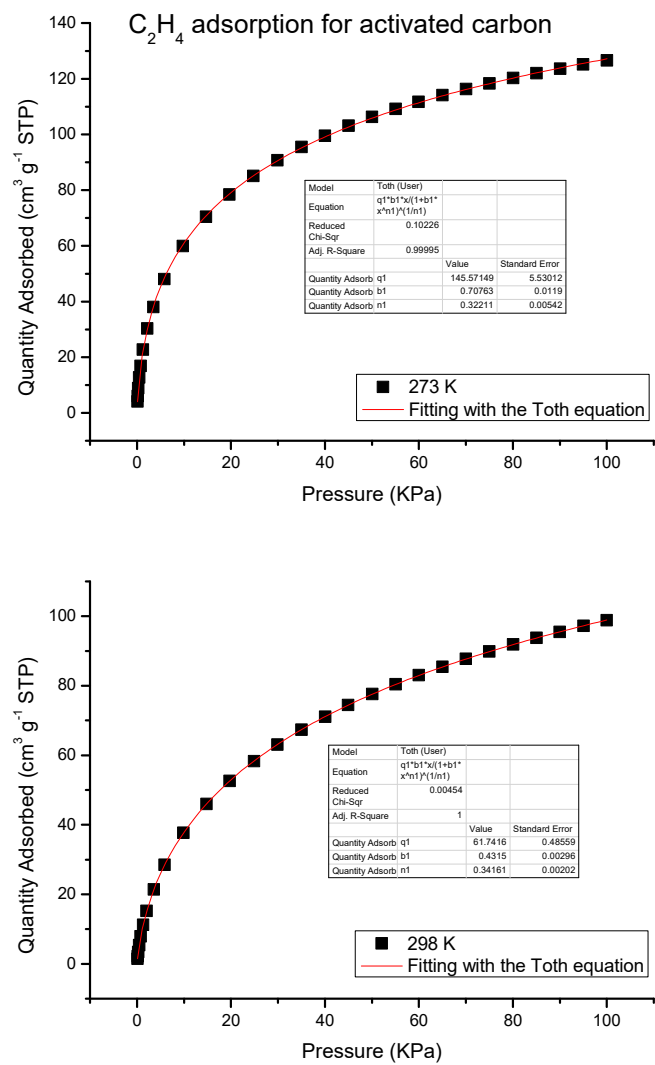

**Figure S12.** C<sub>2</sub>H<sub>4</sub> adsorption isotherms of the activated carbon sample recorded at 273 and 298 K, and fitting results of the isotherms by the Toth equation.

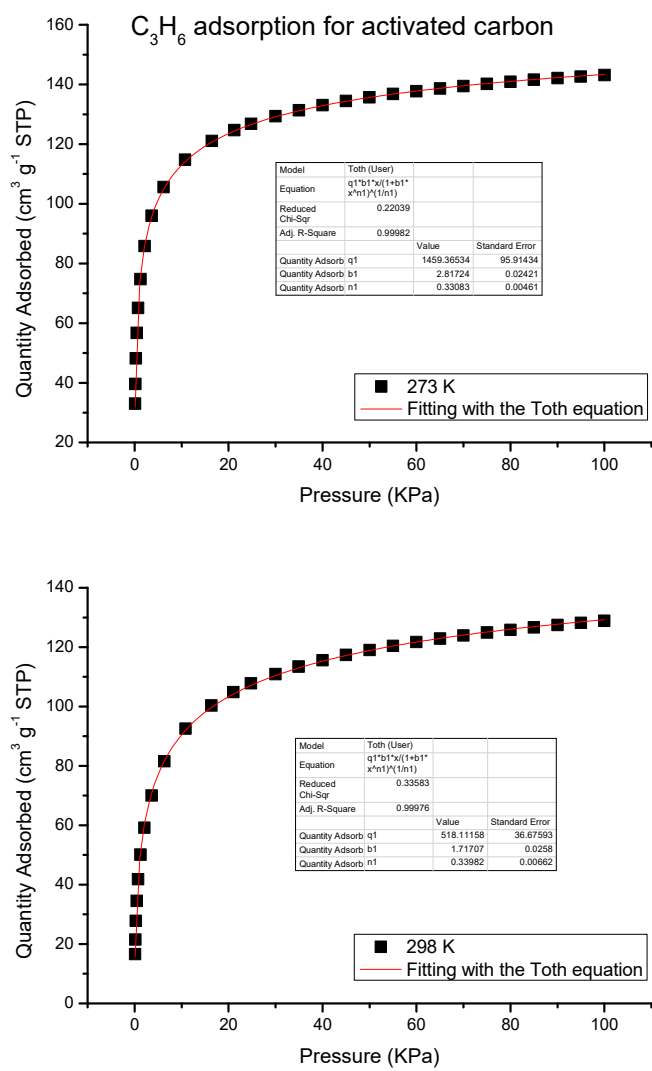

**Figure S13.** C<sub>3</sub>H<sub>6</sub> adsorption isotherms of the activated carbon sample recorded at 273 and 298 K, and fitting results of the isotherms by the Toth equation.

41  
42

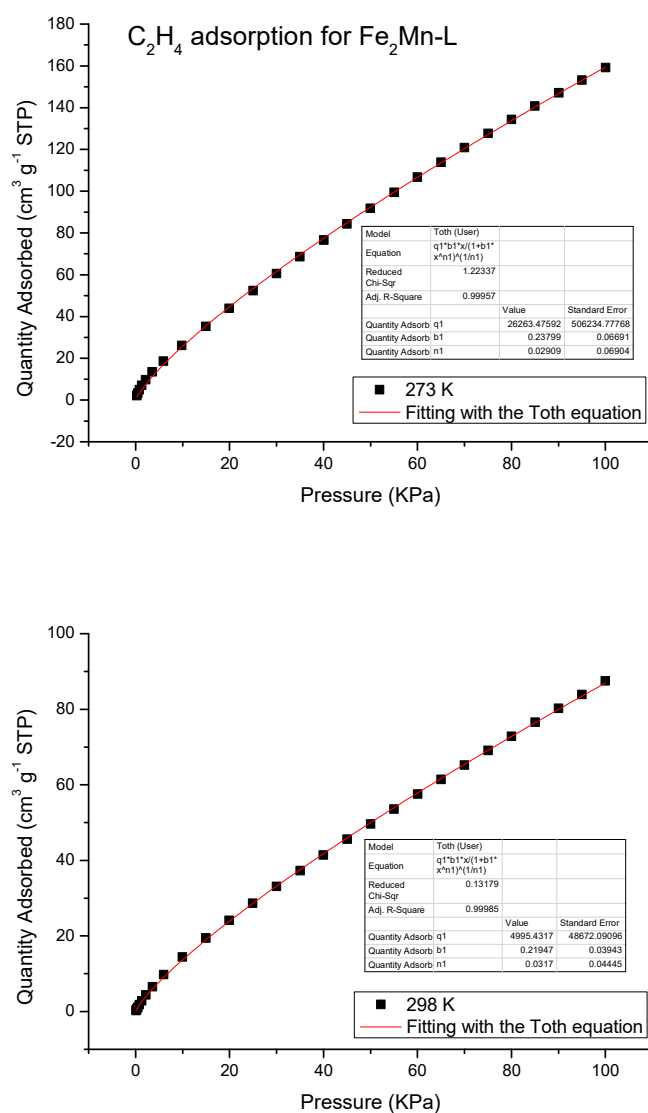

**Figure S14.**  $C_2H_4$  adsorption isotherms of the  $Fe_2Mn-L$  sample recorded at 273 and 298 K, and fitting results of the isotherms by the Toth equation.

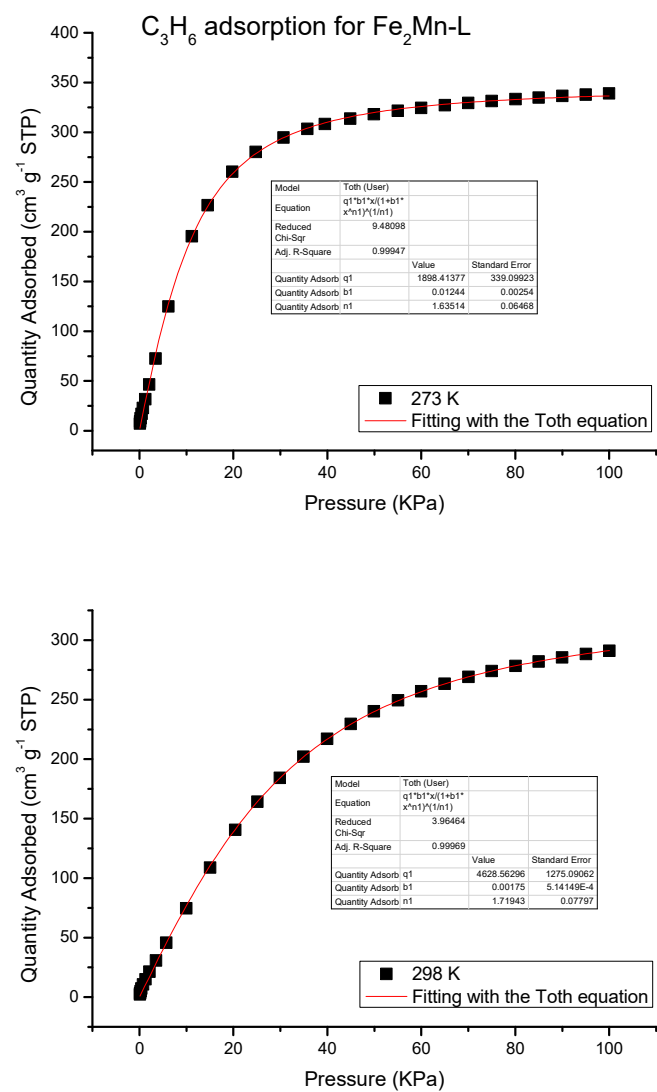

**Figure S15.** C<sub>3</sub>H<sub>6</sub> adsorption isotherms of the Fe<sub>2</sub>Mn-L sample recorded at 273 and 298 K, and fitting results of the isotherms by the Toth equation.

45  
46

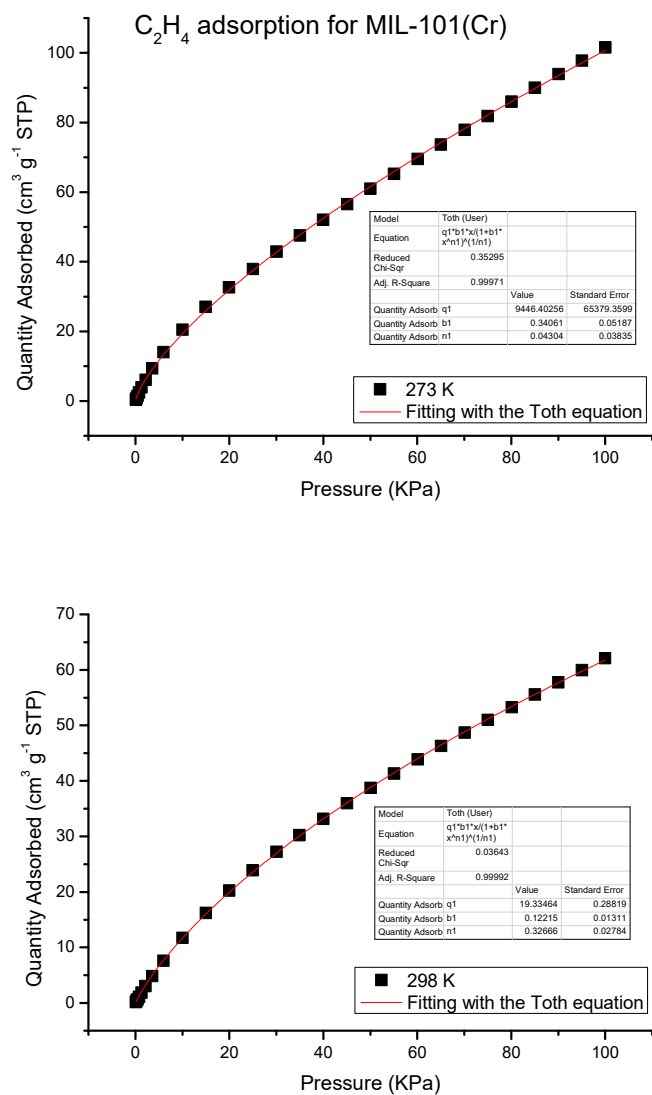

**Figure S16.** C<sub>2</sub>H<sub>4</sub> adsorption isotherms of the MIL-101(Cr) sample recorded at 273 and 298 K, and fitting results of the isotherms by the Toth equation.

47  
48

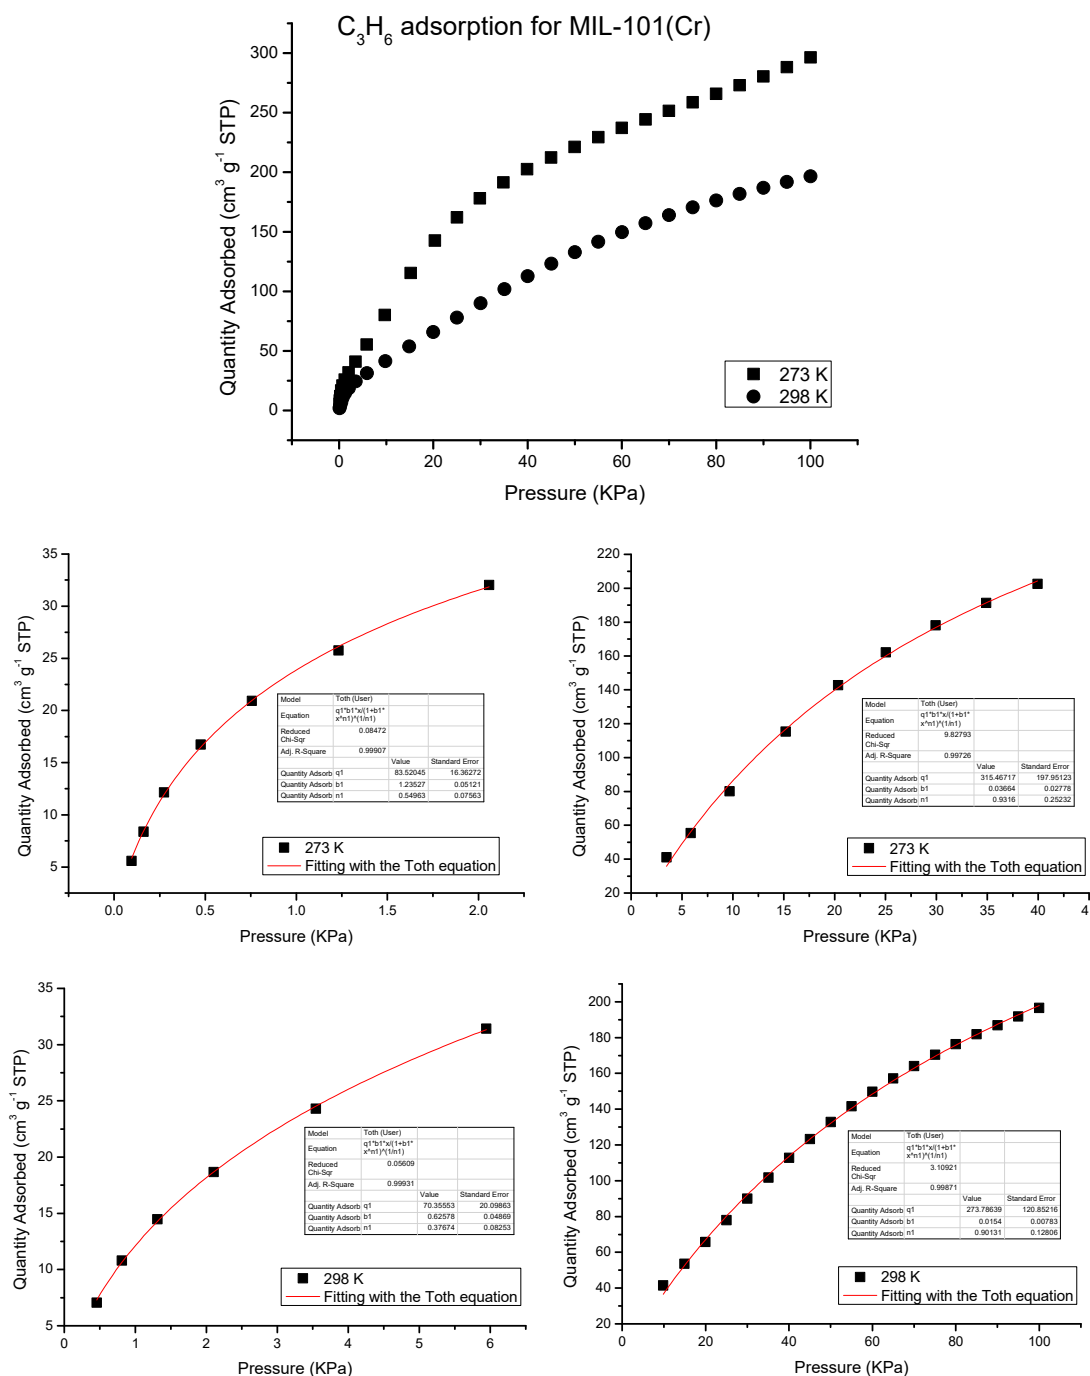

**Figure S17.**  $C_3H_6$  adsorption isotherms of the MIL-101(Cr) sample recorded at 273 and 298 K, and fitting results of the isotherms by the Toth equation. To get better fitting results, the data at low pressure range and the data at high pressure range were fitted separately.

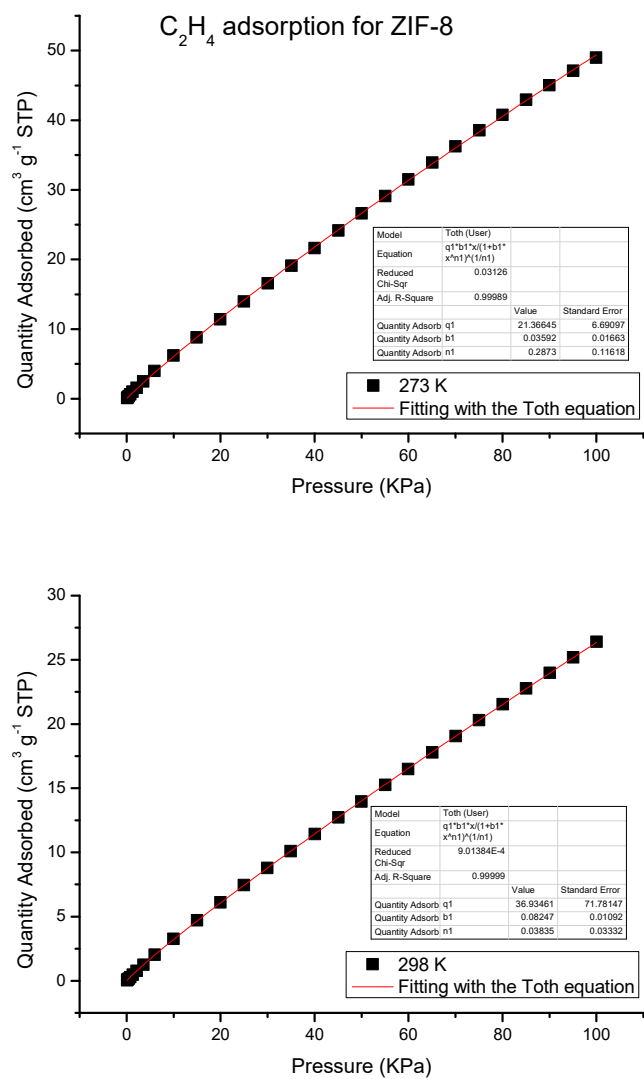

**Figure S18.** C<sub>2</sub>H<sub>4</sub> adsorption isotherms of the ZIF-8 sample recorded at 273 and 298 K, and fitting results of the isotherms by the Toth equation.

52  
53

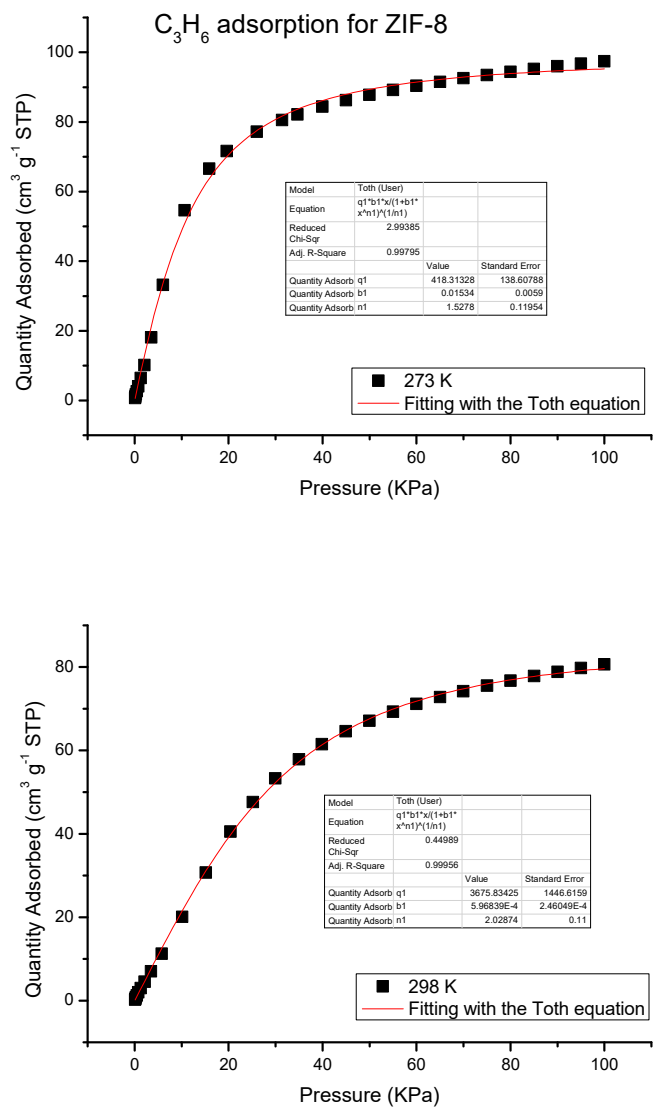

**Figure S19.** C3H6 adsorption isotherms of the ZIF-8 sample recorded at 273 and 298 K, and fitting results of the isotherms by the Toth equation.

54  
55



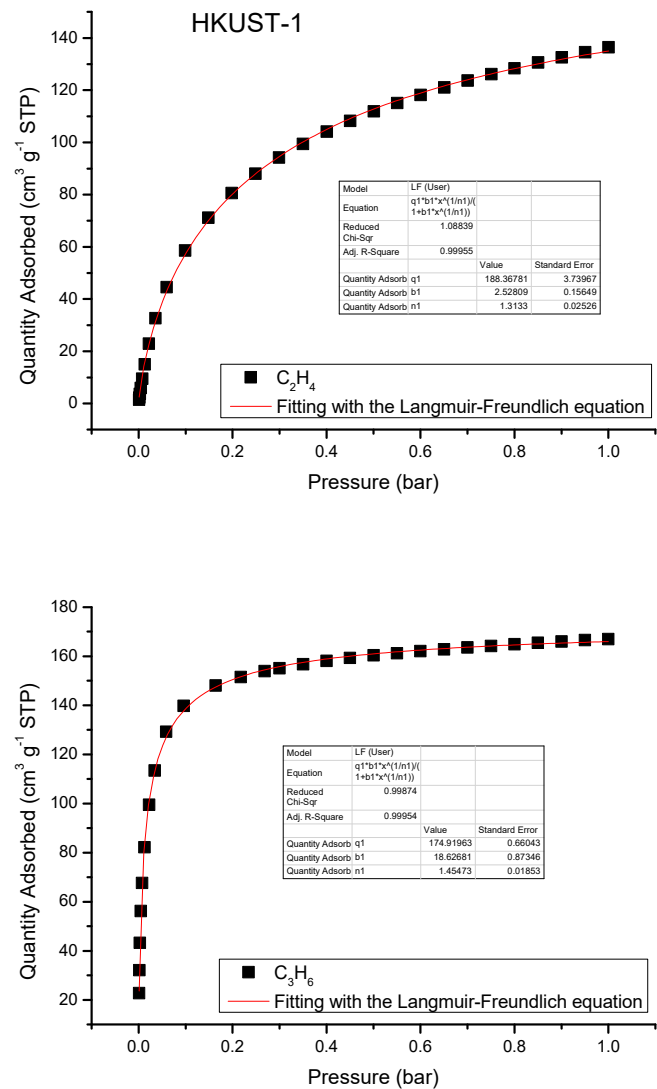

**Figure S20.** C<sub>2</sub>H<sub>4</sub> and C<sub>3</sub>H<sub>6</sub> adsorption isotherms of the prepared HKUST-1 sample recorded at 298 K, and fitting results of the isotherms by the Langmuir-Freundlich equation.

56  
57

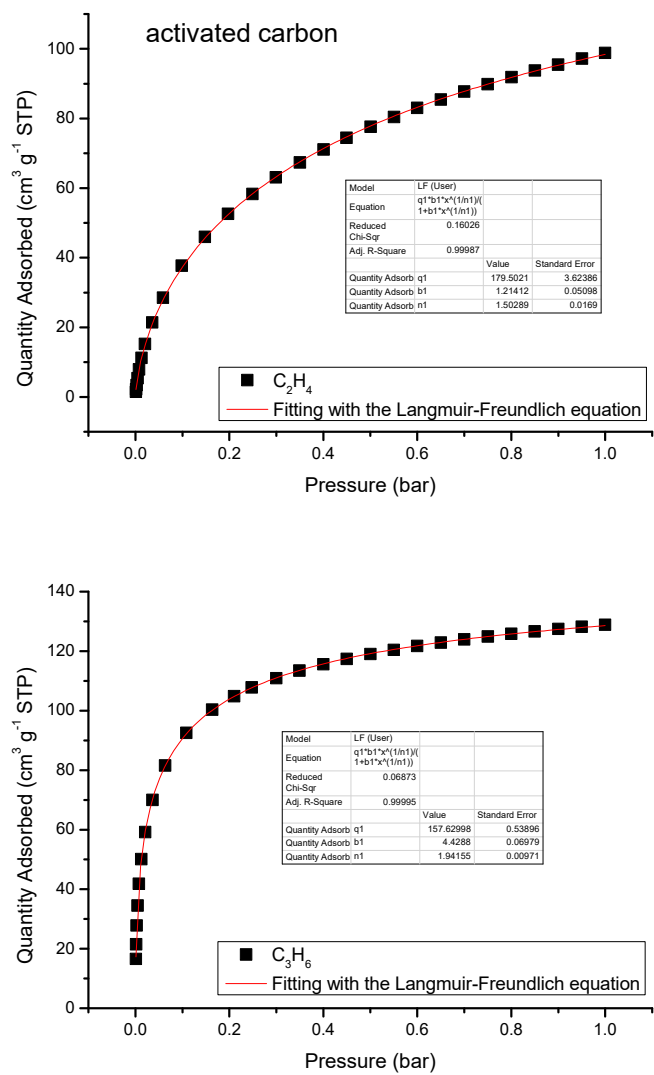

**Figure S21.** C<sub>2</sub>H<sub>4</sub> and C<sub>3</sub>H<sub>6</sub> adsorption isotherms of the activated carbon sample recorded at 298 K, and fitting results of the isotherms by the Langmuir-Freundlich equation.

58  
59

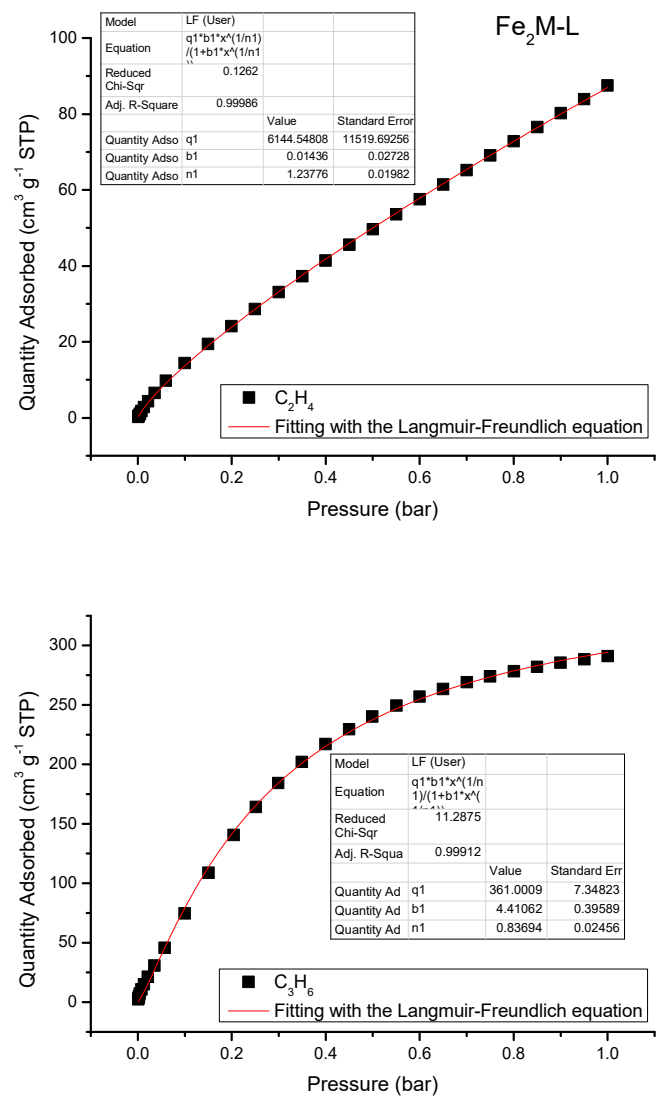

**Figure S22.** C<sub>2</sub>H<sub>4</sub> and C<sub>3</sub>H<sub>6</sub> adsorption isotherms of the prepared Fe<sub>2</sub>M-L sample recorded at 298 K, and fitting results of the isotherms by the Langmuir-Freundlich equation.

60  
61

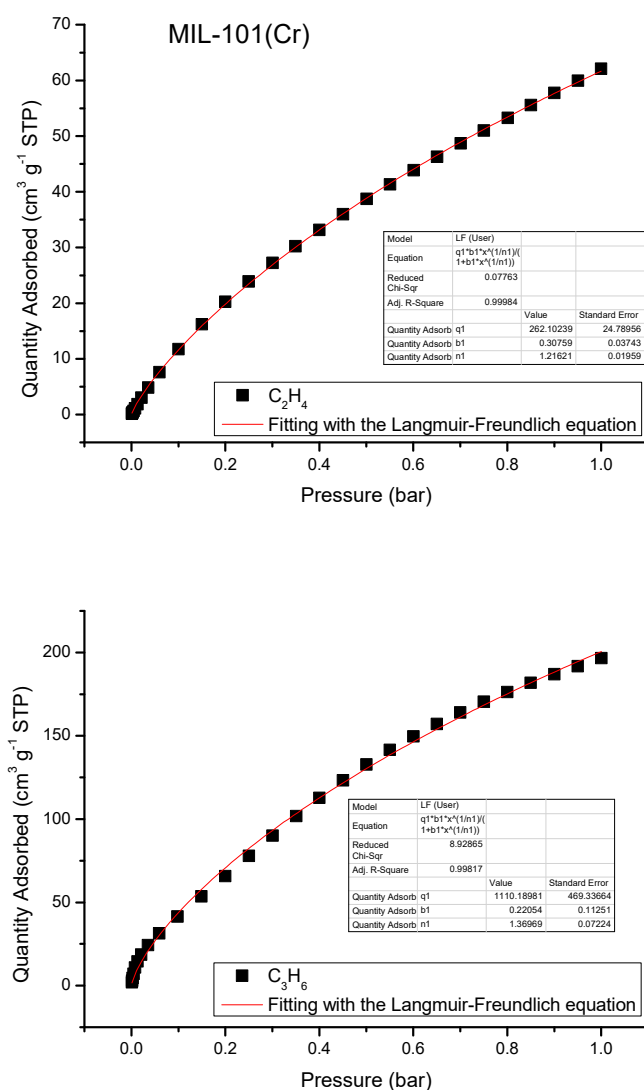

**Figure S23.**  $C_2H_4$  and  $C_3H_6$  adsorption isotherms of the prepared MIL-101(Cr) sample recorded at 298 K, and fitting results of the isotherms by the Langmuir-Freundlich equation.

62

63

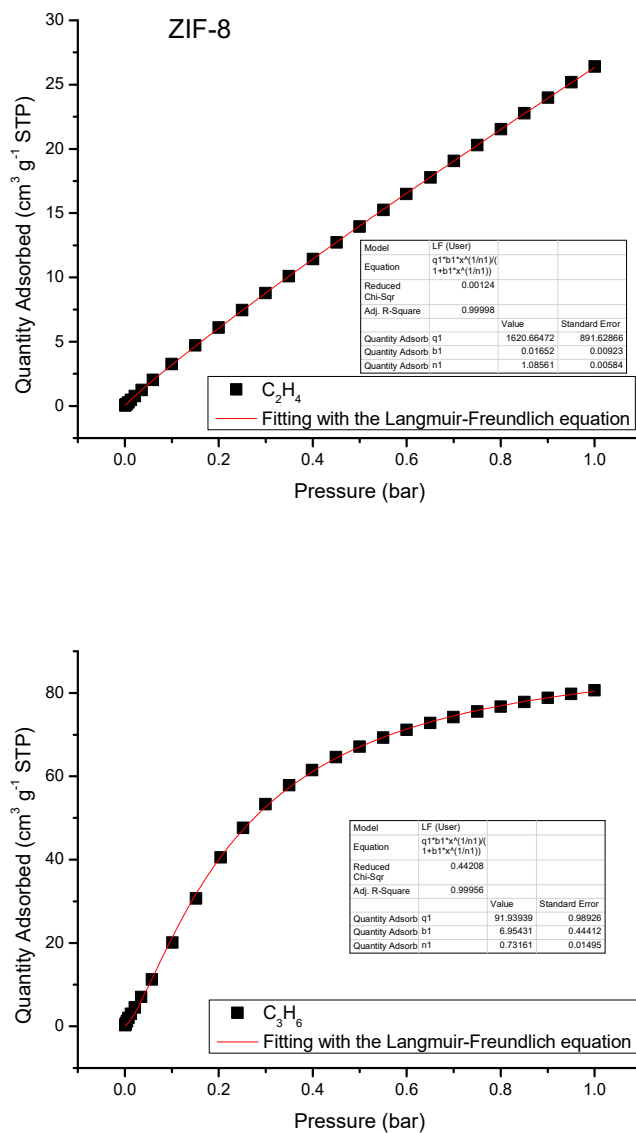

**Figure S24.**  $C_2H_4$  and  $C_3H_6$  adsorption isotherms of the prepared ZIF-8 sample recorded at 298 K, and fitting results of the isotherms by the Langmuir-Freundlich equation.
